# Supplementary material for: Robust and electron deficient oxidovanadium(iv) porphyrin catalysts for selective epoxidation and oxidative bromination reactions in aqueous media
Source: Royal Society of Chemistry journal article supplement (doi:10.1039/c8gc03909g), 2019-01-01
Supplement: c8gc03909g1.pdf [file c8gc03909g1.pdf]

*Electronic Supplementary Information to*

**Robust and Electron Deficient Oxidovanadium(IV) Porphyrin  
Catalysts for Selective Epoxidation and Oxidative Bromination  
Reactions in Aqueous Media.**

Tawseef Ahmad Dar, Bhawna Uprety, Muniappan Sankar\* and Mannar R. Maurya\*

*Department of Chemistry, Indian Institute of Technology Roorkee, Roorkee – 247667, India*

| <b>Table of contents</b>                                                                                                                                                                                                                            | <b>Page No.</b> |
|-----------------------------------------------------------------------------------------------------------------------------------------------------------------------------------------------------------------------------------------------------|-----------------|
| <b>Figure S1.</b> MALDI-TOF spectrum of <b>1</b> in CH <sub>2</sub> Cl <sub>2</sub> using HABA matrix.                                                                                                                                              | 3               |
| <b>Figure S2.</b> MALDI-TOF spectrum of <b>2</b> in CH <sub>2</sub> Cl <sub>2</sub> using HABA matrix.                                                                                                                                              | 3               |
| <b>Figure S3.</b> FT-IR spectra of (a) 3,5-dimethoxyphenyl porphyrin (b) <b>1</b> and (c) <b>2</b> using KBr pellets.                                                                                                                               | 4,5             |
| <b>Figure S4.</b> MALDI-TOF spectrum of oxidoperoxido species of <b>1</b> in CH <sub>3</sub> CN generated with H <sub>2</sub> O <sub>2</sub> and NaHCO <sub>3</sub> using HABA matrix.                                                              | 5               |
| <b>Figure S5.</b> MALDI-TOF spectrum of oxidoperoxido species of <b>2</b> in CH <sub>3</sub> CN generated with H <sub>2</sub> O <sub>2</sub> and NaHCO <sub>3</sub> using HABA matrix.                                                              | 6               |
| <b>Figure S6.</b> Thermogram (TG), Differential thermal analysis (DTA) and Differential thermogram (DTG) of 3,5-dimethoxyphenyl porphyrin, H <sub>2</sub> (TPP)(OMe) <sub>8</sub> at a heating rate of 10 °C /minute scanned from 25 °C to 1000 °C. | 6               |

|                                                                                                                                                                                                           |    |
|-----------------------------------------------------------------------------------------------------------------------------------------------------------------------------------------------------------|----|
| <b>Figure S7.</b> Thermogram (TG), Differential thermal analysis (DTA) and Differential thermogram (DTG) of <b>(1)</b> at a heating rate of 10 °C /minute scanned from 25 °C to 1000 °C.                  | 7  |
| <b>Figure S8.</b> Thermogram (TG), Differential thermal analysis (DTA) and Differential thermogram (DTG) of <b>(2)</b> at a heating rate of 10 °C /minute scanned from 25 °C to 1000 °C.                  | 7  |
| <b>Figure S9.</b> B3LYP/LANL2DZ set generated optimized geometry of <b>1</b> showing (a) top view and (b) side view. In the side view, front and back side substituents are not shown for better viewing. | 8  |
| <b>Figure S10.</b> UV-Visible spectra of <b>1</b> and <b>2</b> after being recovered from the catalytic reactions in CH <sub>2</sub> Cl <sub>2</sub> at 298 K.                                            | 9  |
| <b>Table S1.</b> UV-Visible spectral data and molar absorptivity constants of <b>1</b> and <b>2</b> in CH <sub>2</sub> Cl <sub>2</sub> at 298 K.                                                          | 8  |
| <b>Table S2.</b> Crystal structure data of VOTPP(OMe) <sub>8</sub> ( <b>1</b> ) and VOTPP(OMe) <sub>8</sub> (Br) <sub>16</sub> ( <b>2</b> ).                                                              | 9  |
| <b>Table S3.</b> Selected average bond lengths and bond angles for VOTPP(OMe) <sub>8</sub> ( <b>1</b> ) and VOTPP(OMe) <sub>8</sub> (Br) <sub>16</sub> ( <b>2</b> ) from single crystal XRD studies.      | 10 |
| <b>Equation 1:</b> Equation used for calculating TOF (h <sup>-1</sup> ).                                                                                                                                  | 10 |

Comment 1

Comment 2

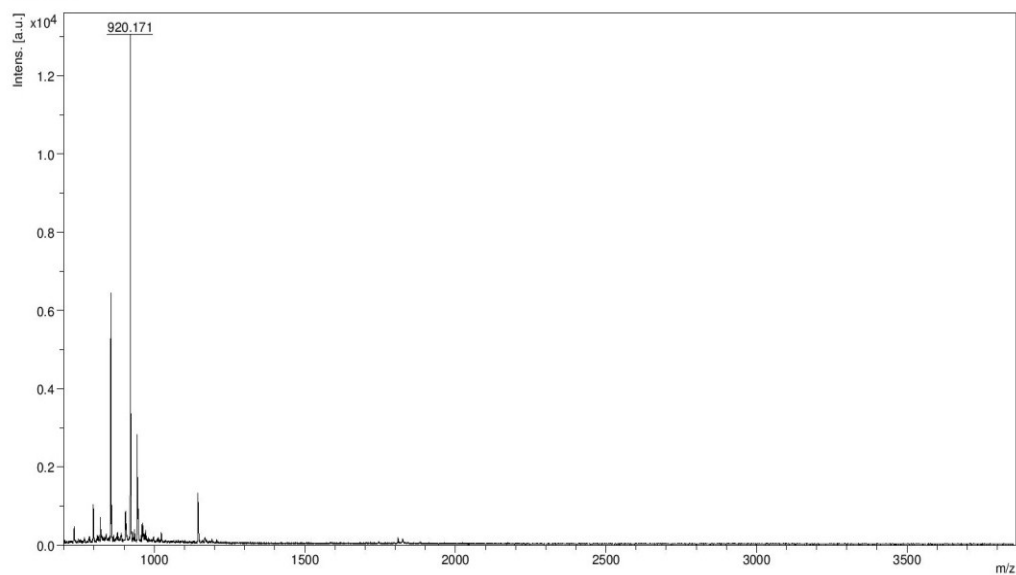

Bruker Daltonics flexAnalysis

printed: 10/17/2016 4:14:49 PM

**Figure S1.** MALDI-TOF spectrum of **1** in CH<sub>2</sub>Cl<sub>2</sub> using HABA matrix.

Comment 1

Comment 2

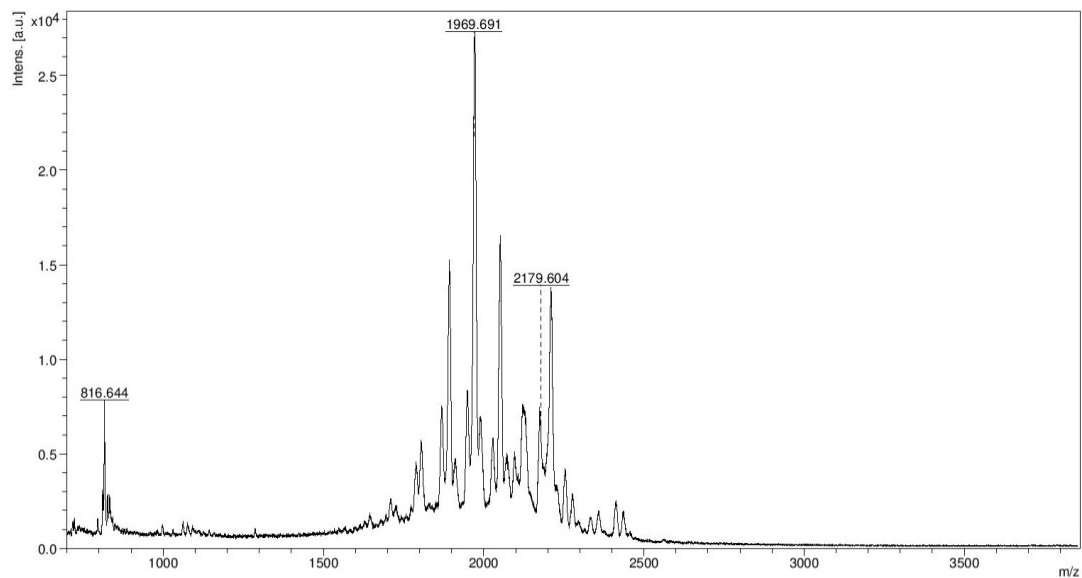

Bruker Daltonics flexAnalysis

printed: 10/17/2016 4:20:29 PM

**Figure S2.** MALDI-TOF spectrum of **2** in CH<sub>2</sub>Cl<sub>2</sub> using HABA matrix.

(a)

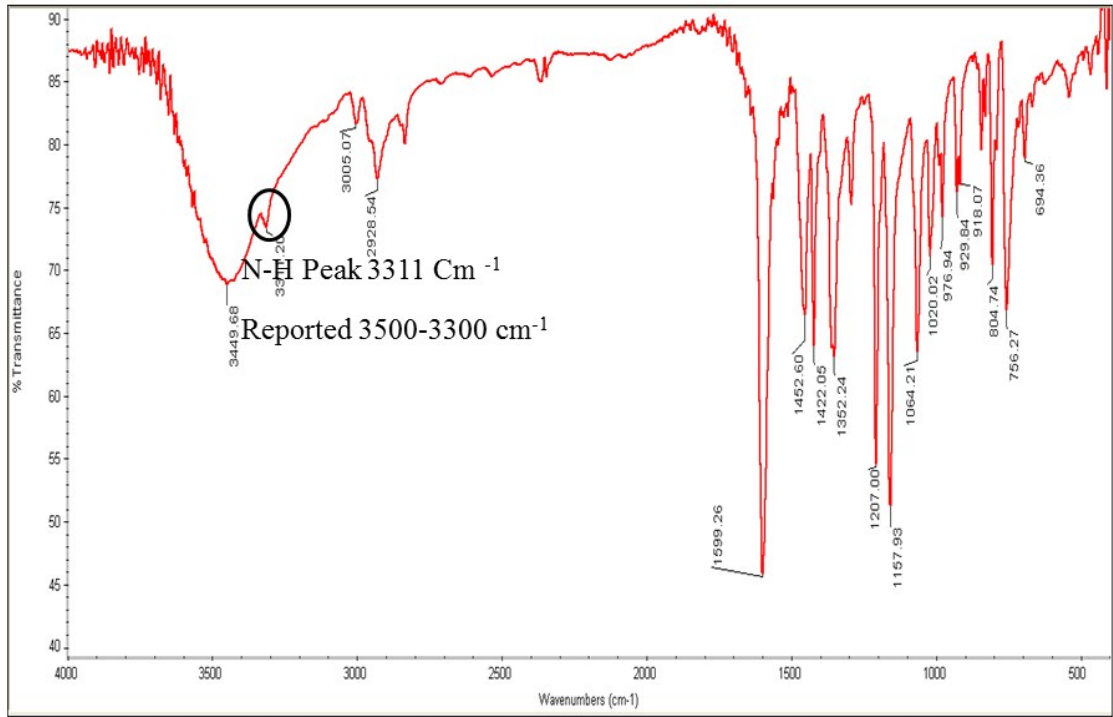

(b)

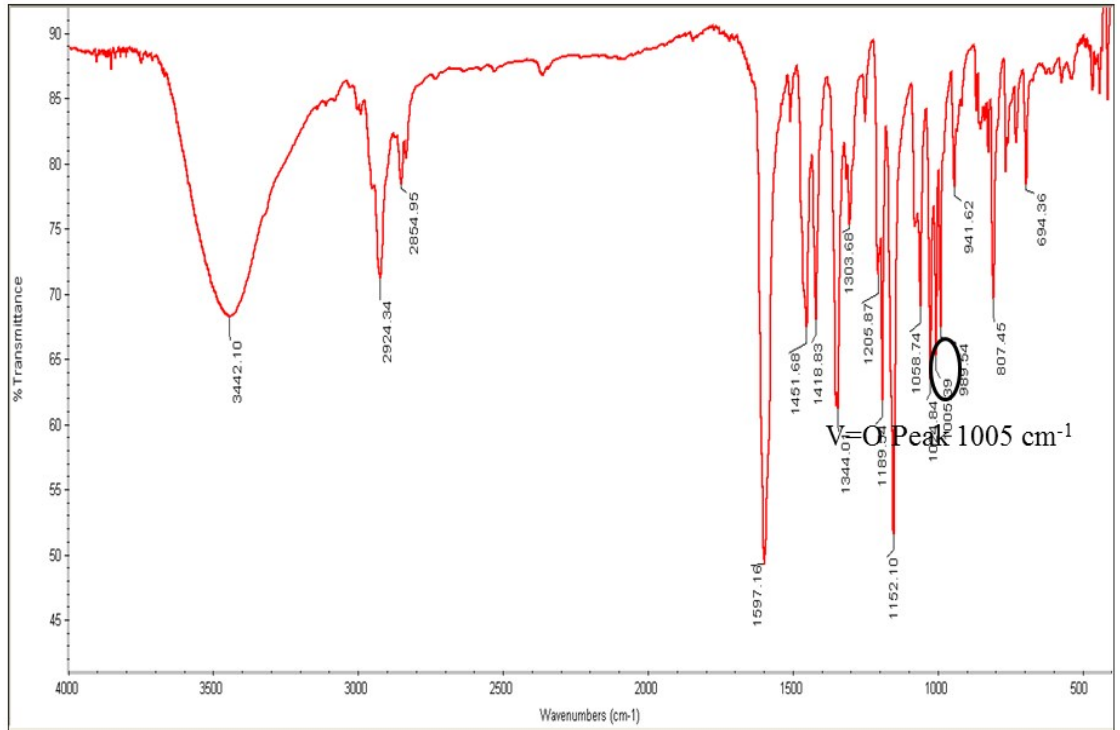

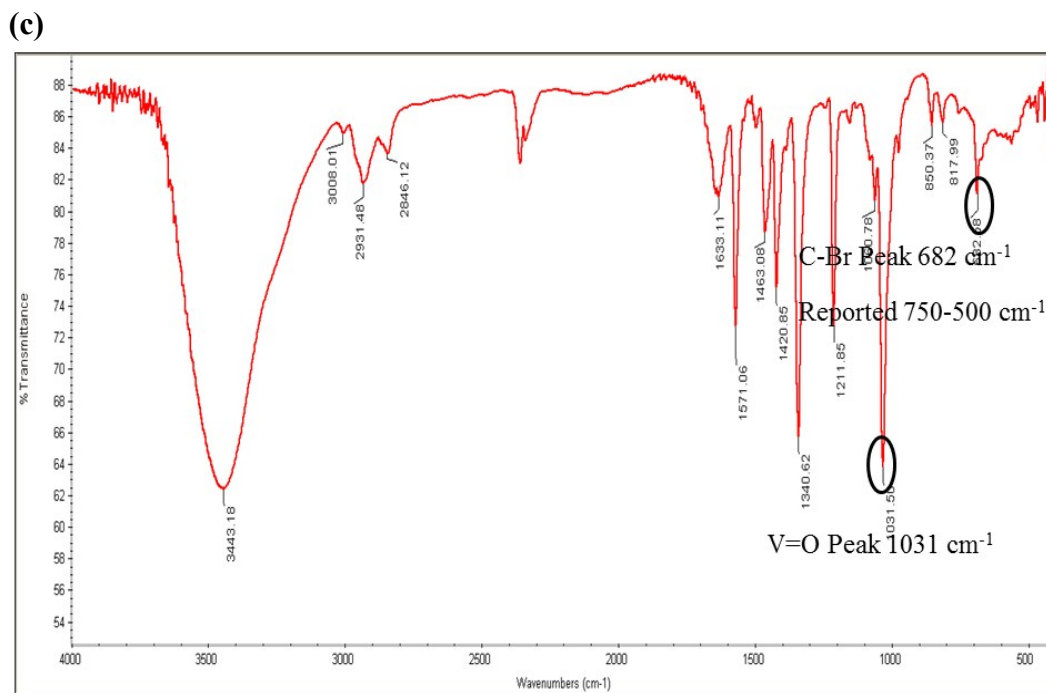

**Figure S3.** FT-IR spectra of (a) 3,5-dimethoxyphenyl porphyrin (b) **1** and (c) **2** using KBr pellets.

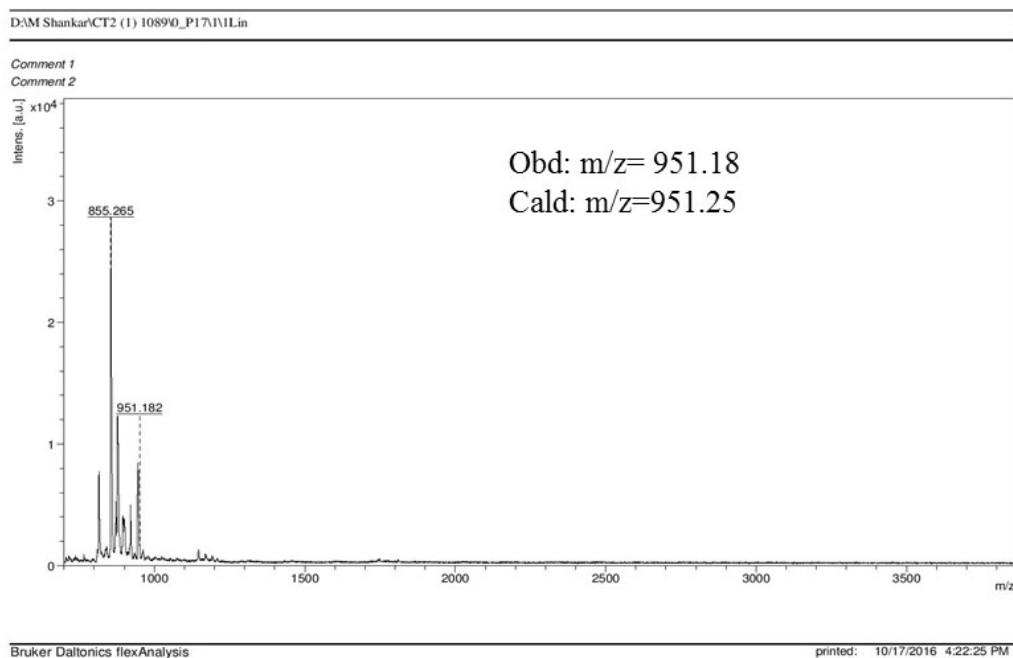

**Figure S4.** MALDI-TOF spectrum of oxidoperoxido species of **1** in CH<sub>3</sub>CN generated with H<sub>2</sub>O<sub>2</sub> and NaHCO<sub>3</sub> using HABA matrix.

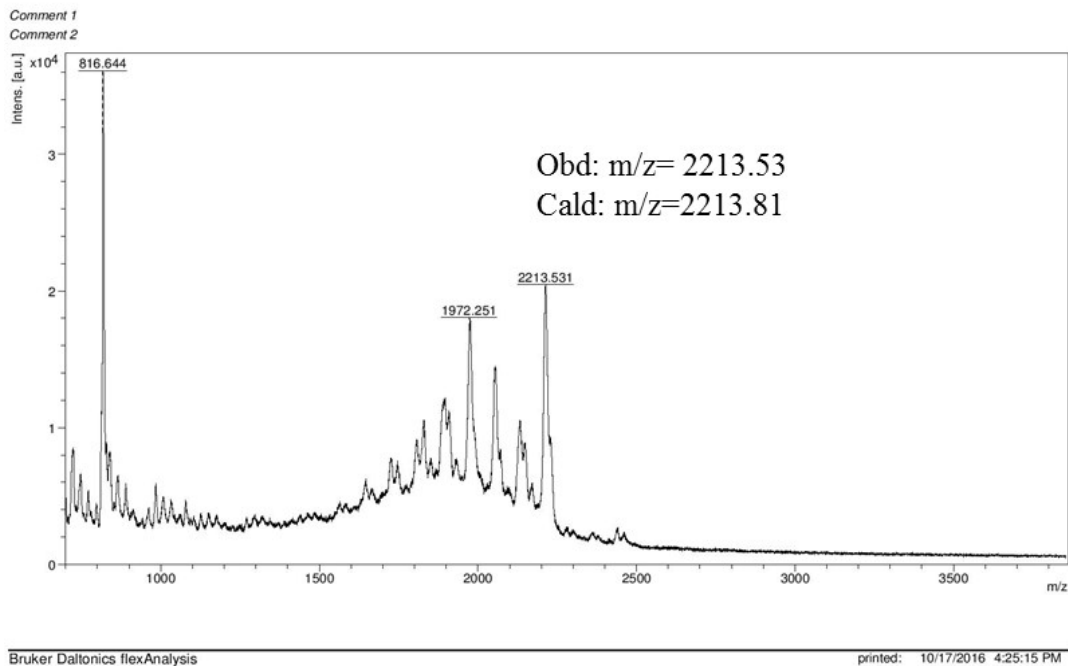

**Figure S5.** MALDI-TOF spectrum of oxidoperoxido species of **2** in  $\text{CH}_3\text{CN}$  generated with  $\text{H}_2\text{O}_2$  and  $\text{NaHCO}_3$  using HABA matrix.

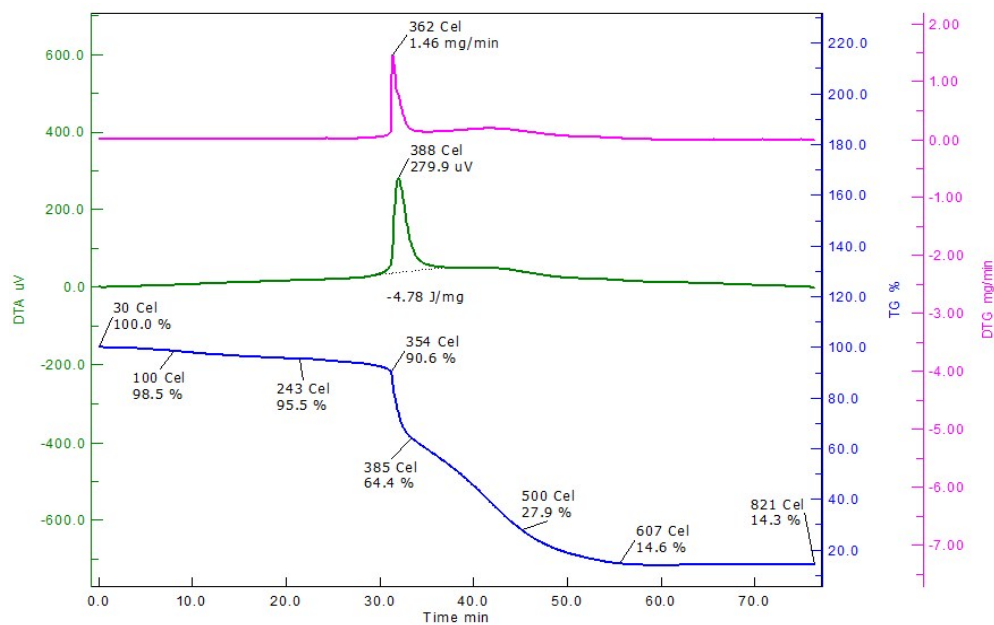

**Figure S6.** Thermogram (TG), Differential thermal analysis (DTA) and Differential thermogram (DTG) of 3,5-dimethoxyphenyl porphyrin,  $\text{H}_2(\text{TPP})(\text{OMe})_8$  at a heating rate of  $10\text{ }^\circ\text{C}/\text{minute}$  scanned from  $25\text{ }^\circ\text{C}$  to  $1000\text{ }^\circ\text{C}$ .

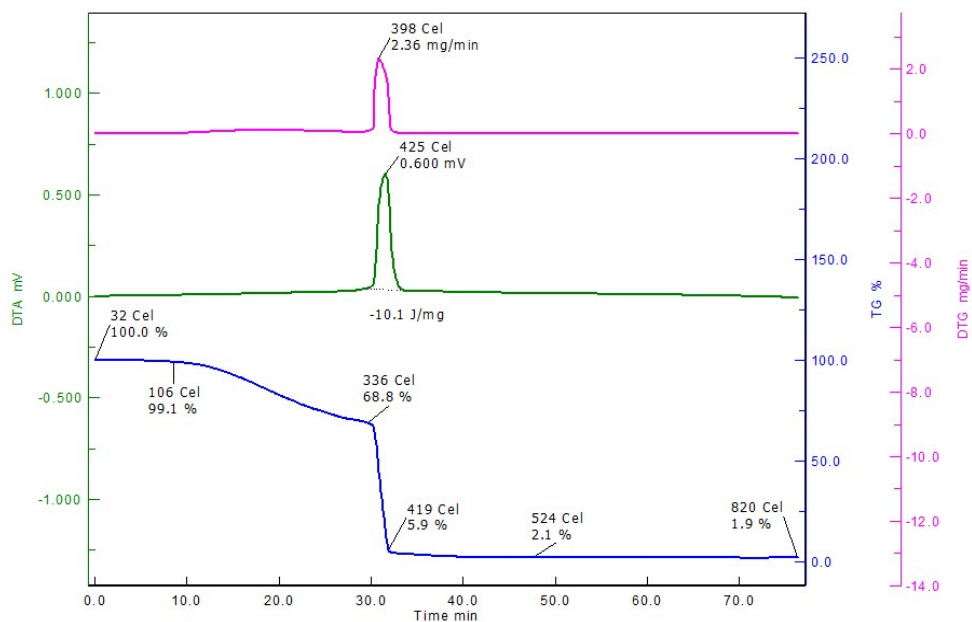

**Figure S7.** Thermogram (TG), Differential thermal analysis (DTA) and Differential thermogram (DTG) of (1) at a heating rate of 10 °C /minute scanned from 25 °C to 1000 °C.

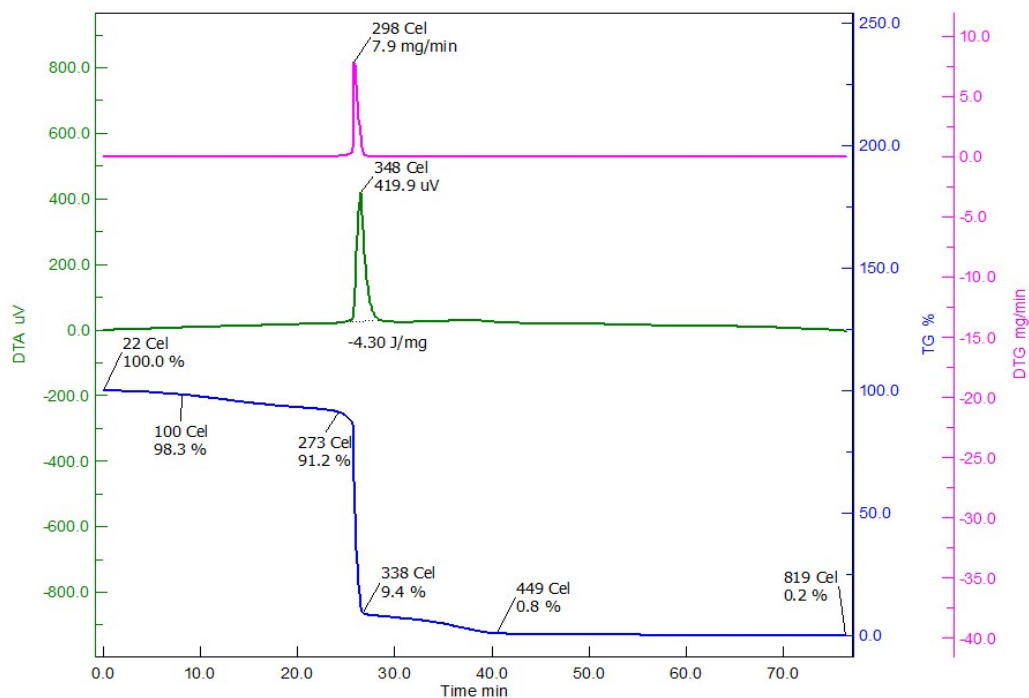

**Figure S8.** Thermogram (TG), Differential thermal analysis (DTA) and Differential thermogram (DTG) of (2) at a heating rate of 10 °C /minute scanned from 25 °C to 1000 °C.

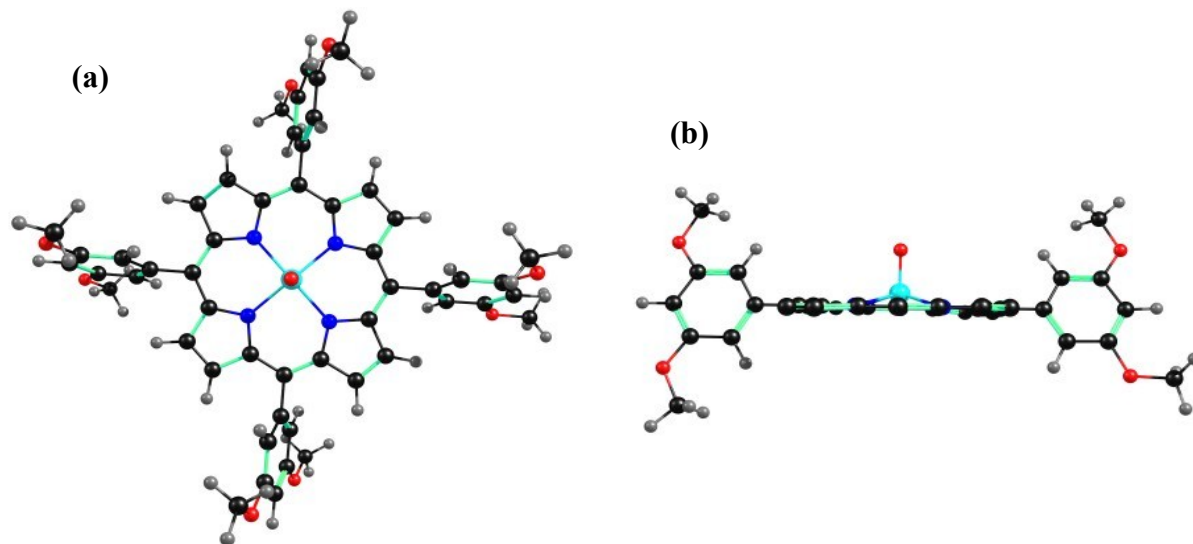

**Figure S9.** B3LYP/LANL2DZ set generated optimized geometry of **1** showing (a) top view and (b) side view. In the side view, front and back side substituents are not shown for better viewing.

**Table S1.** UV-Visible spectral data and molar absorptivity constants of **1** and **2** in  $\text{CH}_2\text{Cl}_2$  at 298 K.

| Compound                                     | B Band(s),nm | Q band(s), nm |
|----------------------------------------------|--------------|---------------|
| VO(TPP)(OMe) <sub>8</sub> ( <b>1</b> )       | 425(5.57)    | 547(4.28)     |
| VOT(TPP)(OMe)(Br) <sub>16</sub> ( <b>2</b> ) | 463(5.31)    | 592(4.24)     |



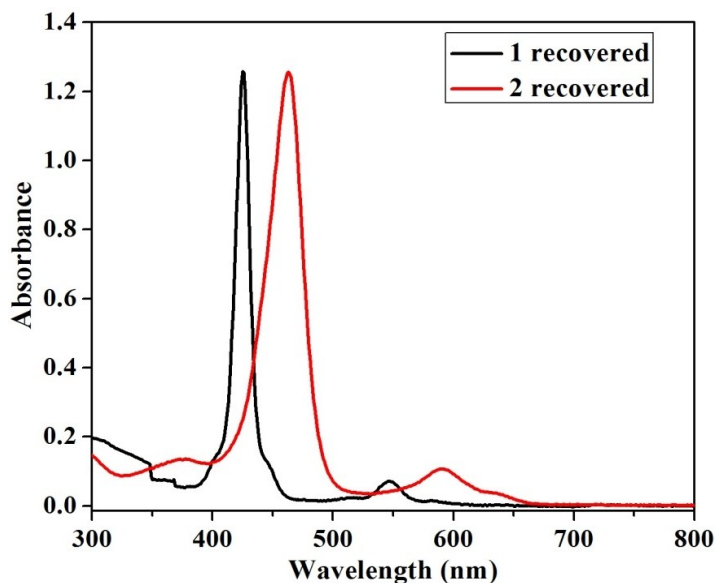

**Figure S10.** UV-Visible spectra of **1** and **2** after being recovered from the catalytic reactions in DCM at 298 K.

**Table S2.** Crystal structure data of VO(TPP)(OMe)<sub>8</sub> (**1**) and VO(TPP)(OMe)<sub>8</sub>(Br)<sub>16</sub> (**2**).

|                                        | <b>1-NC (from CH<sub>3</sub>CN)</b>                             | <b>2</b>                                                                         |
|----------------------------------------|-----------------------------------------------------------------|----------------------------------------------------------------------------------|
| Empirical formula                      | C <sub>53</sub> H <sub>44</sub> N <sub>5</sub> O <sub>9</sub> V | C <sub>52</sub> H <sub>28</sub> Br <sub>16</sub> N <sub>4</sub> O <sub>9</sub> V |
| Formula wt.                            | 945.88                                                          | 2182.28                                                                          |
| Crystal system                         | Orthorhombic                                                    | Orthorhombic                                                                     |
| Space group                            | P c c n                                                         | P c a b                                                                          |
| <i>a</i> (Å)                           | 13.829 (5)                                                      | 20.733 (9)                                                                       |
| <i>b</i> (Å)                           | 14.439 (5)                                                      | 26.304 (12)                                                                      |
| <i>c</i> (Å)                           | 26.153 (5)                                                      | 28.112 (13)                                                                      |
| <i>α</i> (°)                           | 90                                                              | 90                                                                               |
| <i>β</i> (°)                           | 90                                                              | 90                                                                               |
| <i>γ</i> (°)                           | 90                                                              | 90                                                                               |
| Volume (Å <sup>3</sup> )               | 5222.15                                                         | 15331.2                                                                          |
| Z                                      | 8                                                               | 12                                                                               |
| D <sub>calc</sub> (mg/m <sup>3</sup> ) | 1.272                                                           | 2.836                                                                            |
| λ (Å)                                  | 0.71073                                                         | 0.71073                                                                          |
| T (°C)                                 | 293 K                                                           | 223 K                                                                            |
| No. of total reflns.                   | 6490                                                            | 5640                                                                             |
| No. of indepnt. reflns.                | 3816                                                            | 2634                                                                             |
| R                                      | 9.27                                                            | 7.83                                                                             |
| R <sub>w</sub>                         | 26.32                                                           | 23.13                                                                            |
| CCDC No.                               | 1861934                                                         | 1861933                                                                          |

**Table S3.** Selected average bond lengths and bond angles for VO(TPP)(OMe)<sub>8</sub> (**1**) and VO(TPP)(OMe)<sub>8</sub>(Br)<sub>16</sub> (**2**) from single crystal XRD studies.

|                                                       | <b>1</b>     | <b>2</b>       |
|-------------------------------------------------------|--------------|----------------|
| <b>Bond Length (Å)</b>                                |              |                |
| N-C <sub>α</sub>                                      | 1.371 (9)    | 1.365 (4)      |
| C <sub>α</sub> -C <sub>β</sub>                        | 1.445 (1)    | 1.455 (5)      |
| C <sub>β</sub> -C <sub>β</sub>                        | 1.37 (1)     | 1.352 (5)      |
| C <sub>α</sub> -C <sub>m</sub>                        | 1.393 (1)    | 1.387 (5)      |
| M-N                                                   | 2.704        | 2.082 (3)      |
| ΔC <sub>β</sub> <sup>a</sup>                          | 0.036        | 1.011          |
| Δ24 <sup>b</sup>                                      | 0.030        | 0.495          |
| ΔC <sub>α</sub>                                       | 0.026        | 0.396          |
| ΔC <sub>m</sub>                                       | 0.021        | 0.044          |
| ΔN                                                    | 0.033        | 0.113          |
| ΔM                                                    | 0.555        | 0.453          |
| <b>Bond Angle (°)</b>                                 |              |                |
| N-C <sub>α</sub> -C <sub>m</sub>                      | 125.725 (6)  | 124.262 (3)    |
| N-C <sub>α</sub> -C <sub>β</sub>                      | 110.02 (6)   | 106.875 (3)    |
| C <sub>β</sub> -C <sub>α</sub> -C <sub>m</sub>        | 124.26 (6)   | 128 (3)        |
| C <sub>α</sub> -C <sub>β</sub> -C <sub>β</sub>        | 107.03 (6)   | 107.625 (3)    |
| C <sub>α</sub> -N-C <sub>α</sub>                      | 105.92 (5)   | 110.242 (3)    |
| M-N-C <sub>α</sub>                                    | 126          | 121.875 (2)    |
| N-M-N                                                 | 150.955      | 154 (1)        |
| adjacent pyrrole rings                                | 2.96         | 35.065         |
| <b>Mean dihedral angle Relative to Mean Plane (°)</b> |              |                |
| <i>meso</i> -Ph                                       | 74.17, 75.43 | 55.6, 53.17    |
| Pyrrole                                               | 1.41, 2.14   | 25.655, 24.695 |

<sup>a</sup>ΔC<sub>β</sub> refers to the mean plane deviation of β-pyrrole carbons.

<sup>b</sup>Δ24 refers to the mean plane displacement of 24-atom core.

**Equation 1: Equation used for calculating TOF**

$$TOF (h^{-1}) = \% \text{ conversion} \times \text{mmol of substrate} / 100 \times \text{mmol of cat. used} \times \text{reaction time (h)}$$
